# Supplementary material
Source: publisher figshare collection journal article supplement (https://gsajournals.figshare.com/ndownloader/files/15139664)
Supplement: Supplementary file 1 [file 15139664]

## Sheet: phenotypic_data
line_name	population/pedigree_number	pedigree	yield_BLUP	protein_BLUP	oil_BLUP
G13-2304R2	Pop1	AU02-3104 x G00-3213(3)R2	-13.9588	-0.994452	0.0999841
G13-2307R2	Pop1	AU02-3104 x G00-3213(3)R2	0.866073	-1.47067	0.330328
G13-2312R2	Pop1	AU02-3104 x G00-3213(3)R2	26.2996	-0.287756	0.625832
G13-2314R2	Pop1	AU02-3104 x G00-3213(3)R2	1.78135	-0.31401	0.33054
G13-2315R2	Pop1	AU02-3104 x G00-3213(3)R2	44.914	-0.600118	1.02091
G13-2322R2	Pop1	AU02-3104 x G00-3213(3)R2	-3.2193	-0.147838	0.158049
G13-2324R2	Pop1	AU02-3104 x G00-3213(3)R2	-14.6935	-1.05428	-0.265908
G13-2335R2	Pop1	AU02-3104 x G00-3213(3)R2	-20.2929	-0.822054	0.60599
G13-2346R2	Pop1	AU02-3104 x G00-3213(3)R2	20.517	-0.695064	0.684539
G13-2350R2	Pop1	AU02-3104 x G00-3213(3)R2	15.4715	-0.730414	-0.0343189
G13-2351R2	Pop1	AU02-3104 x G00-3213(3)R2	-12.9776	-1.31565	0.457338
G13-2353R2	Pop1	AU02-3104 x G00-3213(3)R2	62.9303	-1.97091	0.789745
G13-2355R2	Pop1	AU02-3104 x G00-3213(3)R2	10.1165	-0.703546	0.643906
G13-2361R2	Pop1	AU02-3104 x G00-3213(3)R2	38.6231	-0.638126	0.497746
G13-2366R2	Pop1	AU02-3104 x G00-3213(3)R2	6.38714	0.926411	0.586097
G13-2368R2	Pop1	AU02-3104 x G00-3213(3)R2	18.5146	0.968919	-0.0112419
G13-2372R2	Pop1	AU02-3104 x G00-3213(3)R2	22.5181	0.0489426	0.531546
G13-2375R2	Pop1	AU02-3104 x G00-3213(3)R2	7.22684	1.26288	-0.245645
G13-2376R2	Pop1	AU02-3104 x G00-3213(3)R2	-15.847	-1.51832	0.0108743
G13-2377R2	Pop1	AU02-3104 x G00-3213(3)R2	-7.52952	0.401934	0.564222
G13-2378R2	Pop1	AU02-3104 x G00-3213(3)R2	16.2248	0.0441556	0.280227
G13-2379R2	Pop1	AU02-3104 x G00-3213(3)R2	37.6195	-0.724201	0.66256
G13-2384R2	Pop1	AU02-3104 x G00-3213(3)R2	-5.95062	-0.998057	0.165708
G13-2385R2	Pop1	AU02-3104 x G00-3213(3)R2	-19.6098	-0.862684	0.592281
G13-2387R2	Pop1	AU02-3104 x G00-3213(3)R2	-2.94662	0.475486	-0.338025
G13-2389R2	Pop1	AU02-3104 x G00-3213(3)R2	0.919163	-0.568927	0.722941
G13-2390R2	Pop1	AU02-3104 x G00-3213(3)R2	-30.2189	-0.365535	0.629211
G13-2394R2	Pop1	AU02-3104 x G00-3213(3)R2	13.188	0.268166	-0.473425
G13-2400R2	Pop1	AU02-3104 x G00-3213(3)R2	1.27743	-1.39661	0.114495
G13-2401R2	Pop1	AU02-3104 x G00-3213(3)R2	-6.99376	-1.208	0.892317
G13-2405R2	Pop1	AU02-3104 x G00-3213(3)R2	-30.0101	-2.08704	0.416542
G13-2407R2	Pop1	AU02-3104 x G00-3213(3)R2	18.2171	-1.85032	0.584908
G13-2412R2	Pop1	AU02-3104 x G00-3213(3)R2	31.1454	-1.61851	1.31176
G13-2414R2	Pop1	AU02-3104 x G00-3213(3)R2	21.0297	0.474448	-0.0758367
G13-2418R2	Pop1	AU02-3104 x G00-3213(3)R2	-2.2172	-1.22349	0.313539
G13-2421R2	Pop1	AU02-3104 x G00-3213(3)R2	-4.93157	0.385196	0.285098
G13-2435R2	Pop1	AU02-3104 x G00-3213(3)R2	-17.5552	-0.680853	0.622709
G13-2449R2	Pop1	AU02-3104 x G00-3213(3)R2	12.1916	-1.34273	0.155906
G13-2451R2	Pop1	AU02-3104 x G00-3213(3)R2	-11.9383	-0.448663	0.436477
G13-2453R2	Pop1	AU02-3104 x G00-3213(3)R2	20.2318	-0.816783	0.105598
G13-2454R2	Pop1	AU02-3104 x G00-3213(3)R2	38.643	-1.77811	0.785566
G13-2463R2	Pop1	AU02-3104 x G00-3213(3)R2	-27.8772	-0.450663	0.295303
G13-2469R2	Pop1	AU02-3104 x G00-3213(3)R2	-5.02088	-1.68069	0.383945
G13-2471R2	Pop1	AU02-3104 x G00-3213(3)R2	-13.6303	-1.39646	1.17173
G13-2473R2	Pop1	AU02-3104 x G00-3213(3)R2	9.84257	-1.72137	0.475876
G13-2476R2	Pop1	AU02-3104 x G00-3213(3)R2	19.0818	-0.876931	0.665474
G13-2484R2	Pop1	AU02-3104 x G00-3213(3)R2	-38.0181	-0.905728	0.239877
G13-2486R2	Pop1	AU02-3104 x G00-3213(3)R2	-9.45742	-0.712699	0.828849
G13-2489R2	Pop1	AU02-3104 x G00-3213(3)R2	-31.1848	0.355717	0.0436296
G13-2529R2	Pop1	AU02-3104 x G00-3213(3)R2	-15.5651	-0.783981	0.132472
G13-2532R2	Pop1	AU02-3104 x G00-3213(3)R2	-17.5708	-1.55678	0.853692
G13-2533R2	Pop1	AU02-3104 x G00-3213(3)R2	-6.80689	-1.15565	0.942981
G13-2534R2	Pop1	AU02-3104 x G00-3213(3)R2	2.16649	-0.750512	0.80848
G13-2536R2	Pop1	AU02-3104 x G00-3213(3)R2	3.80663	-1.51198	1.44407
G13-2547R2	Pop1	AU02-3104 x G00-3213(3)R2	-27.3684	-0.278139	0.0942012
G13-2551R2	Pop1	AU02-3104 x G00-3213(3)R2	-12.2578	0.999343	-0.0395998
G13-2559R2	Pop1	AU02-3104 x G00-3213(3)R2	-28.8072	-0.366095	0.444628
G13-2579R2	Pop1	AU02-3104 x G00-3213(3)R2	-7.77565	0.694305	0.300073
G13-2587R2	Pop1	AU02-3104 x G00-3213(3)R2	63.1002	-0.257212	1.16081
G13-2596R2	Pop1	AU02-3104 x G00-3213(3)R2	4.42672	0.865069	0.356014
G13-2605R2	Pop1	AU02-3104 x G00-3213(3)R2	3.75406	-0.458181	0.0614826
G13-2606R2	Pop1	AU02-3104 x G00-3213(3)R2	0.884135	-2.57037	0.806677
G13-2607R2	Pop1	AU02-3104 x G00-3213(3)R2	9.57008	-0.63632	0.0769545
G13-2608R2	Pop1	AU02-3104 x G00-3213(3)R2	8.99296	-1.15633	0.361024
G13-2611R2	Pop1	AU02-3104 x G00-3213(3)R2	15.9666	-1.5117	0.249063
G13-2613R2	Pop1	AU02-3104 x G00-3213(3)R2	11.3851	-1.00271	0.544542
G13-2617R2	Pop1	AU02-3104 x G00-3213(3)R2	42.3538	-1.10791	0.683063
G13-2618R2	Pop1	AU02-3104 x G00-3213(3)R2	13.3033	-1.47063	0.230978
G13-2636R2	Pop1	AU02-3104 x G00-3213(3)R2	9.51745	-2.57128	0.400011
G13-2648R2	Pop1	AU02-3104 x G00-3213(3)R2	11.004	-1.20784	0.351022
G13-2649R2	Pop1	AU02-3104 x G00-3213(3)R2	-1.69111	-0.872324	0.747441
G13-2650R2	Pop1	AU02-3104 x G00-3213(3)R2	-7.3514	-0.627434	0.771729
G13-2671R2	Pop1	AU02-3104 x G00-3213(3)R2	-14.4428	-1.76859	0.186026
G13-2672R2	Pop1	AU02-3104 x G00-3213(3)R2	11.3513	-1.37572	1.0163
G13-2673R2	Pop1	AU02-3104 x G00-3213(3)R2	-10.0609	-0.808568	-0.240551
G13-2679R2	Pop1	AU02-3104 x G00-3213(3)R2	23.0514	0.0437904	0.611704
G13-2680R2	Pop1	AU02-3104 x G00-3213(3)R2	-52.3263	0.240856	-0.489593
G13-2682R2	Pop1	AU02-3104 x G00-3213(3)R2	-5.75969	-0.895984	1.19075
G13-2685R2	Pop1	AU02-3104 x G00-3213(3)R2	-18.3348	-1.51074	0.462764
G13-2686R2	Pop1	AU02-3104 x G00-3213(3)R2	20.0998	0.716256	-0.159905
G13-2692R2	Pop1	AU02-3104 x G00-3213(3)R2	34.7317	-1.3684	1.3863
G13-2693R2	Pop1	AU02-3104 x G00-3213(3)R2	58.1451	0.42928	0.61088
G13-2696R2	Pop1	AU02-3104 x G00-3213(3)R2	-1.60644	-1.0335	0.754989
G13-2699R2	Pop1	AU02-3104 x G00-3213(3)R2	8.16091	-0.691712	0.666249
G14-1523R2	Pop2	G10PR-10 x G10PR-56389R2	41.3612	0.19426	-0.48571
G14-1532R2	Pop2	G10PR-10 x G10PR-56389R2	12.8224	-0.534744	-0.301469
G14-1535R2	Pop2	G10PR-10 x G10PR-56389R2	-37.7926	0.0203044	-0.050055
G14-1536R2	Pop2	G10PR-10 x G10PR-56389R2	-44.392	-0.0253958	-0.209264
G14-1541R2	Pop2	G10PR-10 x G10PR-56389R2	-6.41469	0.194984	-0.0496282
G14-1542R2	Pop2	G10PR-10 x G10PR-56389R2	-3.3196	0.0475639	-0.231995
G14-1544R2	Pop2	G10PR-10 x G10PR-56389R2	-21.3323	0.825941	-0.877517
G14-1545R2	Pop2	G10PR-10 x G10PR-56389R2	11.899	-1.14726	-0.323606
G14-1546R2	Pop2	G10PR-10 x G10PR-56389R2	77.7075	0.969688	0.0888914
G14-1551R2	Pop2	G10PR-10 x G10PR-56389R2	-25.1901	-1.19738	0.250996
G14-1552R2	Pop2	G10PR-10 x G10PR-56389R2	5.22716	0.126447	-0.139791
G14-1555R2	Pop2	G10PR-10 x G10PR-56389R2	-34.3259	0.28566	0.000602588
G14-1558R2	Pop2	G10PR-10 x G10PR-56389R2	38.4245	-2.86412	0.0899125
G14-1561R2	Pop2	G10PR-10 x G10PR-56389R2	-32.1008	-0.351194	-0.0775548
G14-1566R2	Pop2	G10PR-10 x G10PR-56389R2	5.04037	-1.54972	-0.0688706
G14-1580R2	Pop2	G10PR-10 x G10PR-56389R2	-7.36579	0.0895917	-0.527683
G14-1581R2	Pop2	G10PR-10 x G10PR-56389R2	5.14759	0.289332	-1.1858
G14-1582R2	Pop2	G10PR-10 x G10PR-56389R2	13.2123	-2.95095	0.267343
G14-1586R2	Pop2	G10PR-10 x G10PR-56389R2	24.8143	-0.241379	-0.808044
G14-1587R2	Pop2	G10PR-10 x G10PR-56389R2	-11.5127	0.103373	-1.15275
G14-1590R2	Pop2	G10PR-10 x G10PR-56389R2	-35.7138	0.921039	-0.987943
G14-1592R2	Pop2	G10PR-10 x G10PR-56389R2	26.4923	0.0269251	-0.326074
G14-1597R2	Pop2	G10PR-10 x G10PR-56389R2	10.9974	-0.260543	-0.783439
G14-1599R2	Pop2	G10PR-10 x G10PR-56389R2	-0.0795578	0.914392	-0.133575
G14-1601R2	Pop2	G10PR-10 x G10PR-56389R2	26.054	1.79671	-0.795444
G14-1603R2	Pop2	G10PR-10 x G10PR-56389R2	-56.0802	-2.51813	-0.0455669
G14-1605R2	Pop2	G10PR-10 x G10PR-56389R2	-12.0023	0.0447875	0.0432531
G14-1607R2	Pop2	G10PR-10 x G10PR-56389R2	-37.4931	1.8229	-0.753335
G14-1608R2	Pop2	G10PR-10 x G10PR-56389R2	-14.5991	0.457391	-0.300021
G14-1610R2	Pop2	G10PR-10 x G10PR-56389R2	78.6459	-1.08888	-0.12161
G14-1615R2	Pop2	G10PR-10 x G10PR-56389R2	34.1924	2.06354	-0.191896
G14-1616R2	Pop2	G10PR-10 x G10PR-56389R2	41.7612	0.680861	-0.585475
G14-1629R2	Pop2	G10PR-10 x G10PR-56389R2	19.8406	0.383681	-0.725545
G14-1631R2	Pop2	G10PR-10 x G10PR-56389R2	11.0088	-2.90084	0.320879
G14-1632R2	Pop2	G10PR-10 x G10PR-56389R2	18.7461	-1.79267	0.441922
G14-1633R2	Pop2	G10PR-10 x G10PR-56389R2	42.3596	0.110221	-0.559996
G14-1640R2	Pop2	G10PR-10 x G10PR-56389R2	-2.33109	1.25198	-0.211732
G14-1650R2	Pop2	G10PR-10 x G10PR-56389R2	-73.4952	0.0999111	0.268364
G14-1652R2	Pop2	G10PR-10 x G10PR-56389R2	9.2036	-0.445202	-0.150086
G14-1653R2	Pop2	G10PR-10 x G10PR-56389R2	-7.87969	0.0357703	0.0516868
G14-1654R2	Pop2	G10PR-10 x G10PR-56389R2	-0.916927	-0.546538	0.222475
G14-1657R2	Pop2	G10PR-10 x G10PR-56389R2	-11.1738	-0.461034	-0.0887069
G14-1659R2	Pop2	G10PR-10 x G10PR-56389R2	28.9248	1.10604	-0.961464
G14-1661R2	Pop2	G10PR-10 x G10PR-56389R2	30.9197	1.16501	-1.12357
G14-1663R2	Pop2	G10PR-10 x G10PR-56389R2	-9.36344	-0.930553	0.463757
G14-1664R2	Pop2	G10PR-10 x G10PR-56389R2	-26.2308	0.556107	-0.457946
G14-1665R2	Pop2	G10PR-10 x G10PR-56389R2	-8.05662	1.37022	-0.942793
G14-1666R2	Pop2	G10PR-10 x G10PR-56389R2	-2.53482	1.38246	-1.04439
G14-1668R2	Pop2	G10PR-10 x G10PR-56389R2	-11.5783	-1.50696	-0.0529497
G14-1676R2	Pop2	G10PR-10 x G10PR-56389R2	-65.1177	1.66329	-0.463573
G14-1687R2	Pop2	G10PR-10 x G10PR-56389R2	13.6632	-1.60243	0.585188
G14-1688R2	Pop2	G10PR-10 x G10PR-56389R2	-39.2432	0.192786	-0.290316
G14-1690R2	Pop2	G10PR-10 x G10PR-56389R2	-13.6178	-1.06323	-0.433605
G14-1694R2	Pop2	G10PR-10 x G10PR-56389R2	-6.42468	-2.03915	0.735861
G14-1695R2	Pop2	G10PR-10 x G10PR-56389R2	-7.7101	-0.289277	-0.377158
G14-1696R2	Pop2	G10PR-10 x G10PR-56389R2	34.4179	-1.62932	0.527441
G14-1703R2	Pop2	G10PR-10 x G10PR-56389R2	39.9371	-1.31974	0.695335
G14-1707R2	Pop2	G10PR-10 x G10PR-56389R2	-30.1092	-0.320986	-0.430283
G14-1709R2	Pop2	G10PR-10 x G10PR-56389R2	-6.93545	0.357896	-0.306237
G14-1710R2	Pop2	G10PR-10 x G10PR-56389R2	-46.0126	-1.08829	0.871912
G14-1716R2	Pop2	G10PR-10 x G10PR-56389R2	6.16325	0.0239767	-0.16397
G14-1737R2	Pop2	G10PR-10 x G10PR-56389R2	7.36328	-1.17307	1.00115
G14-1746R2	Pop2	G10PR-10 x G10PR-56389R2	16.3108	-0.811336	-0.0487223
G14-1747R2	Pop2	G10PR-10 x G10PR-56389R2	-2.96765	-0.188308	-0.346337
G14-1751R2	Pop2	G10PR-10 x G10PR-56389R2	-20.4508	-0.519252	0.175733
G14-1752R2	Pop2	G10PR-10 x G10PR-56389R2	2.44769	0.371887	0.297738
G14-1753R2	Pop2	G10PR-10 x G10PR-56389R2	38.876	0.0401929	-0.224759
G14-1755R2	Pop2	G10PR-10 x G10PR-56389R2	43.8509	-0.767804	-0.36216
G14-1758R2	Pop2	G10PR-10 x G10PR-56389R2	-124.806	0.848053	-0.000418051
G14-1768R2	Pop2	G10PR-10 x G10PR-56389R2	44.3477	1.37326	-0.591335
G14-1776R2	Pop2	G10PR-10 x G10PR-56389R2	-52.1024	-0.00917958	0.294416
G14-1779R2	Pop2	G10PR-10 x G10PR-56389R2	2.67417	0.122024	0.222048
G14-1782R2	Pop2	G10PR-10 x G10PR-56389R2	40.2044	0.241434	-0.620314
G14-1790R2	Pop2	G10PR-10 x G10PR-56389R2	-3.7629	-1.3905	0.143891
G14-1793R2	Pop2	G10PR-10 x G10PR-56389R2	-1.02012	0.46109	-0.362684
G14-1795R2	Pop2	G10PR-10 x G10PR-56389R2	-50.42	0.88196	-0.3116
G14-1796R2	Pop2	G10PR-10 x G10PR-56389R2	25.4584	-0.408281	0.325375
G14-1799R2	Pop2	G10PR-10 x G10PR-56389R2	-47.6915	-1.18854	-0.0413708
G14-1801R2	Pop2	G10PR-10 x G10PR-56389R2	43.4817	-0.412386	-0.304363
G14-1808R2	Pop2	G10PR-10 x G10PR-56389R2	-30.4358	-0.312864	-0.79255
G14-1811R2	Pop2	G10PR-10 x G10PR-56389R2	-1.18554	0.413915	0.203233
G14-1817R2	Pop2	G10PR-10 x G10PR-56389R2	21.9002	-3.0571	0.278922
G14-1819R2	Pop2	G10PR-10 x G10PR-56389R2	-20.0249	-1.18339	-0.260943
G14-1833R2	Pop2	G10PR-10 x G10PR-56389R2	30.3263	1.57706	-0.290316
G14-1210R2	Pop3	G10PR-56248R2 x G10PR-56389R2	0.252811	2.21618	-1.24527
G14-1211R2	Pop3	G10PR-56248R2 x G10PR-56389R2	-16.4413	0.239279	-0.226333
G14-1212R2	Pop3	G10PR-56248R2 x G10PR-56389R2	44.9151	1.37632	-0.163641
G14-1215R2	Pop3	G10PR-56248R2 x G10PR-56389R2	-63.5115	2.11298	-1.95448
G14-1216R2	Pop3	G10PR-56248R2 x G10PR-56389R2	27.6255	0.639564	0.314335
G14-1217R2	Pop3	G10PR-56248R2 x G10PR-56389R2	-40.262	0.729706	-0.570287
G14-1218R2	Pop3	G10PR-56248R2 x G10PR-56389R2	38.4443	-0.258779	0.361808
G14-1220R2	Pop3	G10PR-56248R2 x G10PR-56389R2	3.7288	0.295298	0.685503
G14-1221R2	Pop3	G10PR-56248R2 x G10PR-56389R2	-45.2616	1.39358	-0.363832
G14-1222R2	Pop3	G10PR-56248R2 x G10PR-56389R2	5.31719	0.715666	-0.522528
G14-1232R2	Pop3	G10PR-56248R2 x G10PR-56389R2	-12.124	0.271711	-0.113439
G14-1234R2	Pop3	G10PR-56248R2 x G10PR-56389R2	-6.12705	1.88012	-0.960713
G14-1236R2	Pop3	G10PR-56248R2 x G10PR-56389R2	56.5628	-0.257526	-0.644619
G14-1256R2	Pop3	G10PR-56248R2 x G10PR-56389R2	37.5559	0.713971	-0.301595
G14-1259R2	Pop3	G10PR-56248R2 x G10PR-56389R2	-0.0473552	0.230655	-0.102794
G14-1277R2	Pop3	G10PR-56248R2 x G10PR-56389R2	4.51112	0.683013	-0.321858
G14-1278R2	Pop3	G10PR-56248R2 x G10PR-56389R2	3.48775	1.92281	-0.168438
G14-1279R2	Pop3	G10PR-56248R2 x G10PR-56389R2	44.5548	-0.18529	-0.0135709
G14-1282R2	Pop3	G10PR-56248R2 x G10PR-56389R2	-9.7547	0.259137	-0.380339
G14-1284R2	Pop3	G10PR-56248R2 x G10PR-56389R2	-33.336	0.307092	0.371426
G14-1285R2	Pop3	G10PR-56248R2 x G10PR-56389R2	-24.5551	0.206847	0.0153763
G14-1288R2	Pop3	G10PR-56248R2 x G10PR-56389R2	-28.615	0.565077	0.0920863
G14-1290R2	Pop3	G10PR-56248R2 x G10PR-56389R2	-8.73512	-0.280892	0.276414
G14-1291R2	Pop3	G10PR-56248R2 x G10PR-56389R2	51.8915	1.27096	-0.46978
G14-1292R2	Pop3	G10PR-56248R2 x G10PR-56389R2	29.3123	0.211269	0.576951
G14-1299R2	Pop3	G10PR-56248R2 x G10PR-56389R2	-4.83233	0.926255	-0.40291
G14-1301R2	Pop3	G10PR-56248R2 x G10PR-56389R2	12.1815	1.3523	-0.0396233
G14-1302R2	Pop3	G10PR-56248R2 x G10PR-56389R2	19.2924	1.05676	-0.445407
G14-1304R2	Pop3	G10PR-56248R2 x G10PR-56389R2	36.819	0.821587	0.21077
G14-1307R2	Pop3	G10PR-56248R2 x G10PR-56389R2	10.0931	0.535593	-0.413042
G14-1314R2	Pop3	G10PR-56248R2 x G10PR-56389R2	6.48717	1.21689	-0.153452
G14-1318R2	Pop3	G10PR-56248R2 x G10PR-56389R2	-17.605	0.347116	0.156283
G14-1323R2	Pop3	G10PR-56248R2 x G10PR-56389R2	-16.6989	-0.179172	-0.082531
G14-1324R2	Pop3	G10PR-56248R2 x G10PR-56389R2	-62.0247	-0.266371	-0.138044
G14-1329R2	Pop3	G10PR-56248R2 x G10PR-56389R2	-10.3556	1.39969	-1.02621
G14-1331R2	Pop3	G10PR-56248R2 x G10PR-56389R2	5.45957	0.0935544	-0.0955572
G14-1334R2	Pop3	G10PR-56248R2 x G10PR-56389R2	-21.8904	0.164316	-0.421213
G14-1336R2	Pop3	G10PR-56248R2 x G10PR-56389R2	-1.62886	0.13778	-0.314108
G14-1337R2	Pop3	G10PR-56248R2 x G10PR-56389R2	14.9754	0.603627	-0.522528
G14-1341R2	Pop3	G10PR-56248R2 x G10PR-56389R2	-1.88078	0.492319	0.0606889
G14-1342R2	Pop3	G10PR-56248R2 x G10PR-56389R2	8.98946	1.24026	-0.15107
G14-1344R2	Pop3	G10PR-56248R2 x G10PR-56389R2	-4.69906	0.901415	0.277861
G14-1345R2	Pop3	G10PR-56248R2 x G10PR-56389R2	16.8692	1.76802	-0.329095
G14-1346R2	Pop3	G10PR-56248R2 x G10PR-56389R2	-37.3505	-1.87325	0.184717
G14-1351R2	Pop3	G10PR-56248R2 x G10PR-56389R2	-4.79976	1.30955	-0.310279
G14-1352R2	Pop3	G10PR-56248R2 x G10PR-56389R2	-25.3465	0.165152	0.421889
G14-1353R2	Pop3	G10PR-56248R2 x G10PR-56389R2	26.2631	1.04441	-0.134636
G14-1362R2	Pop3	G10PR-56248R2 x G10PR-56389R2	8.85162	-0.118951	-0.198833
G14-1363R2	Pop3	G10PR-56248R2 x G10PR-56389R2	-46.4699	0.171466	-0.158307
G14-1365R2	Pop3	G10PR-56248R2 x G10PR-56389R2	49.2007	1.51888	-0.75896
G14-1366R2	Pop3	G10PR-56248R2 x G10PR-56389R2	-19.0873	-0.0260767	-0.0844914
G14-1367R2	Pop3	G10PR-56248R2 x G10PR-56389R2	-41.539	-0.420941	0.11431
G14-1380R2	Pop3	G10PR-56248R2 x G10PR-56389R2	10.4519	-0.450425	0.452992
G14-1386R2	Pop3	G10PR-56248R2 x G10PR-56389R2	-43.2326	0.217387	0.549965
G14-1387R2	Pop3	G10PR-56248R2 x G10PR-56389R2	-18.811	0.327975	0.208316
G14-1388R2	Pop3	G10PR-56248R2 x G10PR-56389R2	8.45755	-0.395879	0.19102
G14-1390R2	Pop3	G10PR-56248R2 x G10PR-56389R2	8.41297	0.514954	-0.620014
G14-1393R2	Pop3	G10PR-56248R2 x G10PR-56389R2	51.1366	0.744929	-0.132254
G14-1394R2	Pop3	G10PR-56248R2 x G10PR-56389R2	-17.0923	0.133137	0.00235006
G14-1403R2	Pop3	G10PR-56248R2 x G10PR-56389R2	-5.46909	-0.440105	-0.130294
G14-1408R2	Pop3	G10PR-56248R2 x G10PR-56389R2	35.3005	1.49284	-0.564292
G14-1412R2	Pop3	G10PR-56248R2 x G10PR-56389R2	-35.8746	1.25965	0.0810205
G14-1413R2	Pop3	G10PR-56248R2 x G10PR-56389R2	-25.27	0.986918	0.363255
G14-1414R2	Pop3	G10PR-56248R2 x G10PR-56389R2	-21.8862	0.817204	0.325969
G14-1415R2	Pop3	G10PR-56248R2 x G10PR-56389R2	39.5353	0.0655446	0.292335
G14-1436R2	Pop3	G10PR-56248R2 x G10PR-56389R2	23.6458	1.04441	0.0954941
G14-1440R2	Pop3	G10PR-56248R2 x G10PR-56389R2	-5.79192	1.25194	-0.60317
G14-1450R2	Pop3	G10PR-56248R2 x G10PR-56389R2	-18.8451	1.68252	-0.117781
G14-1452R2	Pop3	G10PR-56248R2 x G10PR-56389R2	21.4757	2.24736	-1.00305
G14-1460R2	Pop3	G10PR-56248R2 x G10PR-56389R2	-22.2537	0.889621	-0.17082
G14-1461R2	Pop3	G10PR-56248R2 x G10PR-56389R2	5.84785	0.339745	-0.322792
G14-1462R2	Pop3	G10PR-56248R2 x G10PR-56389R2	17.9106	0.828958	-0.168438
G14-1469R2	Pop3	G10PR-56248R2 x G10PR-56389R2	-22.1758	1.17392	-0.110544
G14-1471R2	Pop3	G10PR-56248R2 x G10PR-56389R2	8.543	0.765568	-0.352253
G14-1472R2	Pop3	G10PR-56248R2 x G10PR-56389R2	-16.4809	0.373626	-0.155881
G14-1473R2	Pop3	G10PR-56248R2 x G10PR-56389R2	37.0549	1.41149	-0.273582
G14-1478R2	Pop3	G10PR-56248R2 x G10PR-56389R2	10.0579	1.32304	-0.694764
G14-1487R2	Pop3	G10PR-56248R2 x G10PR-56389R2	7.66399	1.1137	-0.829368
G14-1493R2	Pop3	G10PR-56248R2 x G10PR-56389R2	-7.16354	1.59871	-0.765684
G14-1504R2	Pop3	G10PR-56248R2 x G10PR-56389R2	-12.5848	1.07589	0.00673372
G14-1515R2	Pop3	G10PR-56248R2 x G10PR-56389R2	19.9251	1.1695	-0.45212
G14-1518R2	Pop3	G10PR-56248R2 x G10PR-56389R2	-41.179	0.823061	-0.738697
G13-1002R2	Pop4	G93-2225 x G09PR-54329R2	26.4209	0.852401	-0.409093
G13-1005R2	Pop4	G93-2225 x G09PR-54329R2	-2.19543	-0.282059	-0.241598
G13-1006R2	Pop4	G93-2225 x G09PR-54329R2	16.8087	0.0624559	0.1012
G13-1008R2	Pop4	G93-2225 x G09PR-54329R2	-34.543	1.23847	-0.188986
G13-1009R2	Pop4	G93-2225 x G09PR-54329R2	-33.634	0.541443	-0.0575793
G13-1014R2	Pop4	G93-2225 x G09PR-54329R2	-22.9762	0.520666	-0.210946
G13-1015R2	Pop4	G93-2225 x G09PR-54329R2	-1.13854	1.85904	-0.0075716
G13-1016R2	Pop4	G93-2225 x G09PR-54329R2	-8.4801	0.720137	0.0584115
G13-1017R2	Pop4	G93-2225 x G09PR-54329R2	-32.433	0.908356	-0.346101
G13-1018R2	Pop4	G93-2225 x G09PR-54329R2	-32.2394	1.12821	-0.465201
G13-1021R2	Pop4	G93-2225 x G09PR-54329R2	-13.3339	1.18935	-0.72894
G13-1022R2	Pop4	G93-2225 x G09PR-54329R2	28.4903	0.422524	-0.477037
G13-1023R2	Pop4	G93-2225 x G09PR-54329R2	10.9789	-0.697351	0.278327
G13-1024R2	Pop4	G93-2225 x G09PR-54329R2	13.4004	-0.744106	0.087067
G13-1029R2	Pop4	G93-2225 x G09PR-54329R2	26.3199	0.571102	-0.049277
G13-1031R2	Pop4	G93-2225 x G09PR-54329R2	-65.7676	-0.286319	-0.385967
G13-1032R2	Pop4	G93-2225 x G09PR-54329R2	45.2384	1.96434	-0.921824
G13-1034R2	Pop4	G93-2225 x G09PR-54329R2	1.41019	-0.0494494	0.0596641
G13-1038R2	Pop4	G93-2225 x G09PR-54329R2	18.4123	-0.656226	0.0428378
G13-1042R2	Pop4	G93-2225 x G09PR-54329R2	-24.2483	1.08815	-1.45694
G13-1043R2	Pop4	G93-2225 x G09PR-54329R2	10.0164	0.655938	-0.937082
G13-1047R2	Pop4	G93-2225 x G09PR-54329R2	-29.8229	-0.373523	-0.0196081
G13-1056R2	Pop4	G93-2225 x G09PR-54329R2	32.6072	-0.141779	0.0161386
G13-1061R2	Pop4	G93-2225 x G09PR-54329R2	-10.2914	-0.395948	0.078385
G13-1070R2	Pop4	G93-2225 x G09PR-54329R2	50.5675	0.65077	0.0354329
G13-1075R2	Pop4	G93-2225 x G09PR-54329R2	54.8548	-0.360377	-0.184166
G13-1076R2	Pop4	G93-2225 x G09PR-54329R2	31.7848	-0.0634071	-0.393876
G13-1077R2	Pop4	G93-2225 x G09PR-54329R2	25.8799	-0.268092	0.0529823
G13-1081R2	Pop4	G93-2225 x G09PR-54329R2	-31.2776	0.239296	-0.89716
G13-1082R2	Pop4	G93-2225 x G09PR-54329R2	-6.65039	0.296411	0.131501
G13-1084R2	Pop4	G93-2225 x G09PR-54329R2	37.9831	-0.79351	0.522861
G13-1086R2	Pop4	G93-2225 x G09PR-54329R2	-34.3934	1.11647	-0.300039
G13-1091R2	Pop4	G93-2225 x G09PR-54329R2	-35.8051	1.36408	-0.945304
G13-1093R2	Pop4	G93-2225 x G09PR-54329R2	23.994	-0.117482	0.19216
G13-1094R2	Pop4	G93-2225 x G09PR-54329R2	27.155	0.164341	-0.0978663
G13-1101R2	Pop4	G93-2225 x G09PR-54329R2	-18.3593	0.909748	-0.0909324
G13-1102R2	Pop4	G93-2225 x G09PR-54329R2	-48.6981	1.88567	-0.694257
G13-1106R2	Pop4	G93-2225 x G09PR-54329R2	-22.2149	0.321821	-0.357334
G13-1107R2	Pop4	G93-2225 x G09PR-54329R2	-5.31655	0.450228	0.0262112
G13-1111R2	Pop4	G93-2225 x G09PR-54329R2	-22.7204	2.0984	-0.552667
G13-1112R2	Pop4	G93-2225 x G09PR-54329R2	20.7452	-0.643035	0.109536
G13-1115R2	Pop4	G93-2225 x G09PR-54329R2	-21.6802	0.743347	-0.946886
G13-1117R2	Pop4	G93-2225 x G09PR-54329R2	-15.1473	1.40145	-0.790649
G13-1119R2	Pop4	G93-2225 x G09PR-54329R2	48.477	-0.00418947	0.0931585
G13-1120R2	Pop4	G93-2225 x G09PR-54329R2	-13.8604	-0.114027	0.0202661
G13-1121R2	Pop4	G93-2225 x G09PR-54329R2	21.6948	-1.34679	0.549447
G13-1129R2	Pop4	G93-2225 x G09PR-54329R2	1.29396	0.00815302	0.194002
G13-1131R2	Pop4	G93-2225 x G09PR-54329R2	-17.0082	0.201182	-0.299529
G13-1139R2	Pop4	G93-2225 x G09PR-54329R2	11.4245	1.15162	-0.856879
G13-1143R2	Pop4	G93-2225 x G09PR-54329R2	-28.3569	1.10349	-0.477578
G13-1156R2	Pop4	G93-2225 x G09PR-54329R2	-29.3677	0.831183	-0.149262
G13-1162R2	Pop4	G93-2225 x G09PR-54329R2	-2.24086	2.48418	-1.5445
G13-1163R2	Pop4	G93-2225 x G09PR-54329R2	-20.8957	0.346108	-0.0576571
G13-1164R2	Pop4	G93-2225 x G09PR-54329R2	-37.7815	0.0405824	-0.320028
G13-1165R2	Pop4	G93-2225 x G09PR-54329R2	7.56974	0.705555	-0.8076
G13-1166R2	Pop4	G93-2225 x G09PR-54329R2	-0.404633	0.722498	-0.424647
G13-1168R2	Pop4	G93-2225 x G09PR-54329R2	17.7615	1.70869	-0.280547
G13-1172R2	Pop4	G93-2225 x G09PR-54329R2	5.26162	-1.11769	0.0125955
G13-1173R2	Pop4	G93-2225 x G09PR-54329R2	-26.4477	-0.179766	0.0370923
G13-1174R2	Pop4	G93-2225 x G09PR-54329R2	-31.1112	-0.449734	0.60772
G13-1179R2	Pop4	G93-2225 x G09PR-54329R2	-22.6725	1.84356	-0.778563
G13-1181R2	Pop4	G93-2225 x G09PR-54329R2	36.2866	1.07763	-0.53312
G13-1182R2	Pop4	G93-2225 x G09PR-54329R2	-29.5096	0.856324	-0.0724053
G13-1183R2	Pop4	G93-2225 x G09PR-54329R2	90.6707	-0.36514	-0.317413
G13-1185R2	Pop4	G93-2225 x G09PR-54329R2	69.3036	1.19865	-0.522674
G13-1187R2	Pop4	G93-2225 x G09PR-54329R2	34.4038	-0.252076	0.190318
G13-1188R2	Pop4	G93-2225 x G09PR-54329R2	11.9573	0.443731	0.404318
G13-1190R2	Pop4	G93-2225 x G09PR-54329R2	-27.5243	-0.00971795	-0.0967219
G13-1194R2	Pop4	G93-2225 x G09PR-54329R2	12.3818	0.788369	0.186201
G13-1203R2	Pop4	G93-2225 x G09PR-54329R2	-70.3671	1.22851	-0.756041
G13-1204R2	Pop4	G93-2225 x G09PR-54329R2	15.1416	2.35066	-0.42703
G13-1208R2	Pop4	G93-2225 x G09PR-54329R2	-12.126	1.81043	-0.122651
G13-1209R2	Pop4	G93-2225 x G09PR-54329R2	-76.1679	0.842912	-0.123959
G13-1211R2	Pop4	G93-2225 x G09PR-54329R2	19.944	-0.160831	-0.114175
G13-1214R2	Pop4	G93-2225 x G09PR-54329R2	-38.8329	0.489197	-0.11792
G13-1220R2	Pop4	G93-2225 x G09PR-54329R2	30.0921	0.840441	-0.63616
G13-1237R2	Pop4	G93-2225 x G09PR-54329R2	12.4784	0.374656	-0.0188325
G13-1241R2	Pop4	G93-2225 x G09PR-54329R2	32.5086	-0.0117136	-0.664797
G13-1242R2	Pop4	G93-2225 x G09PR-54329R2	-11.8502	-0.31344	-0.403558
G13-1244R2	Pop4	G93-2225 x G09PR-54329R2	-8.7348	-0.615905	-0.594857
G13-1253R2	Pop4	G93-2225 x G09PR-54329R2	-39.8614	0.817175	-0.983547
G13-1255R2	Pop4	G93-2225 x G09PR-54329R2	-3.84966	1.56117	-0.947731
G13-1258R2	Pop4	G93-2225 x G09PR-54329R2	-10.4431	2.18476	-1.02768
G13-1259R2	Pop4	G93-2225 x G09PR-54329R2	33.7111	1.69688	-0.86529
G13-1335R2	Ped4	G09PR-54329R2 x {G00-3213(4) x [P97M50(3) x L85-2378]}	43.7652	NA	NA
G13-1381R2	Ped4	G09PR-54329R2 x {G00-3213(4) x [P97M50(3) x L85-2378]}	-15.4473	NA	NA
G13-1449R2	Ped4	G09PR-54329R2 x {G00-3213(4) x [P97M50(3) x L85-2378]}	-3.74471	NA	NA
G13-1524R2	Ped8	G09PR-54457R2 x {G00-3213(4) x [P97M50(3) x L85-2378]}	-9.55657	NA	NA
G13-1579R2	Ped8	G09PR-54457R2 x {G00-3213(4) x [P97M50(3) x L85-2378]}	5.67731	NA	NA
G13-1621R2	Ped8	G09PR-54457R2 x {G00-3213(4) x [P97M50(3) x L85-2378]}	-13.0756	NA	NA
G13-1754R2	Ped8	G09PR-54457R2 x {G00-3213(4) x [P97M50(3) x L85-2378]}	4.60878	NA	NA
G13-1813R2	Ped2	G09PR-54329R2 x [G00-3213(4) x (G00-3209 x G01-PR68)]	41.9583	NA	NA
G13-1834R2	Ped2	G09PR-54329R2 x [G00-3213(4) x (G00-3209 x G01-PR68)]	8.74154	NA	NA
G13-1882R2	Ped2	G09PR-54329R2 x [G00-3213(4) x (G00-3209 x G01-PR68)]	35.2382	NA	NA
G13-1902R2	Ped2	G09PR-54329R2 x [G00-3213(4) x (G00-3209 x G01-PR68)]	39.5716	NA	NA
G13-1915R2	Ped2	G09PR-54329R2 x [G00-3213(4) x (G00-3209 x G01-PR68)]	33.3974	NA	NA
G13-2021R2	Ped3	G09PR-54329R2 x [G00-3213(4) x (G00-3209 x G01-PR68)]	37.0882	NA	NA
G13-2073R2	Ped6	G09PR-54457R2 x [G00-3213(4) x (G00-3209 x G01-PR68)]	64.507	NA	NA
G13-2075R2	Ped6	G09PR-54457R2 x [G00-3213(4) x (G00-3209 x G01-PR68)]	41.9566	NA	NA
G13-2083R2	Ped6	G09PR-54457R2 x [G00-3213(4) x (G00-3209 x G01-PR68)]	-14.0272	NA	NA
G13-2114R2	Ped7	G09PR-54457R2 x [G00-3213(4) x (G00-3209 x G01-PR68)]	43.3898	NA	NA
G13-2166R2	Ped6	G09PR-54457R2 x [G00-3213(4) x (G00-3209 x G01-PR68)]	-2.59126	NA	NA
G13-2171R2	Ped6	G09PR-54457R2 x [G00-3213(4) x (G00-3209 x G01-PR68)]	19.8698	NA	NA
G13-2302R2	Ped6	G09PR-54457R2 x [G00-3213(4) x (G00-3209 x G01-PR68)]	-1.79808	NA	NA
G13-2742R2	Ped11	R01-2346 x [G00-3880 x R2]	-11.5746	NA	NA
G13-2755R2	Ped11	R01-2346 x [G00-3880 x R2]	24.1456	NA	NA
G13-3384R2	Ped10	NCC02-307 x [G00-3213 x R2]	-17.1591	NA	NA
G13-3544R2	Ped10	NCC02-307 x [G00-3213 x R2]	-18.6617	NA	NA
G13-3638R2	Ped10	NCC02-307 x [G00-3213 x R2]	-74.8224	NA	NA
G13-3791R2	Ped1	5601T x [G00-3880 x R2]	-84.5633	NA	NA
G13-3870R2	Ped1	5601T x [G00-3880 x R2]	-110.297	NA	NA
G13-3901R2	Ped1	5601T x [G00-3880 x R2]	-30.4174	NA	NA
G13-3969R2	Ped1	5601T x [G00-3880 x R2]	-70.0442	NA	NA
G13-1338R2	Ped5	G09PR-54329R2 x {G00-3213(4) x [P97M50(3) x L85-2378]}	-14.2216	NA	NA
G13-1488R2	Ped5	G09PR-54329R2 x {G00-3213(4) x [P97M50(3) x L85-2378]}	0.351859	NA	NA
G13-1699R2	Ped9	G09PR-54457R2 x {G00-3213(4) x [P97M50(3) x L85-2378]}	29.8197	NA	NA
G13-1769R2	Ped9	G09PR-54457R2 x {G00-3213(4) x [P97M50(3) x L85-2378]}	33.175	NA	NA
G13-1806R2	Ped2	G09PR-54329R2 x [G00-3213(4) x (G00-3209 x G01-PR68)]	-32.641	NA	NA
G13-2300R2	Ped7	G09PR-54457R2 x [G00-3213(4) x (G00-3209 x G01-PR68)]	-14.0192	NA	NA
G13-2759R2	Ped11	R01-2346 x [G00-3880 x R2]	56.8373	NA	NA
G13-2762R2	Ped11	R01-2346 x [G00-3880 x R2]	25.8419	NA	NA
G13-2769R2	Ped11	R01-2346 x [G00-3880 x R2]	-39.6197	NA	NA
G13-2790R2	Ped11	R01-2346 x [G00-3880 x R2]	-7.9958	NA	NA
G13-2820R2	Ped11	R01-2346 x [G00-3880 x R2]	14.4791	NA	NA
G13-2842R2	Ped11	R01-2346 x [G00-3880 x R2]	22.9595	NA	NA
G13-2906R2	Ped11	R01-2346 x [G00-3880 x R2]	-40.5899	NA	NA
G13-2909R2	Ped11	R01-2346 x [G00-3880 x R2]	-34.2254	NA	NA
G13-2939R2	Ped12	R98-209 x [G00-3880 x R2]	13.862	NA	NA
G13-2947R2	Ped12	R98-209 x [G00-3880 x R2]	56.4629	NA	NA
G13-2959R2	Ped12	R98-209 x [G00-3880 x R2]	-19.1338	NA	NA
G13-2996R2	Ped12	R98-209 x [G00-3880 x R2]	21.5406	NA	NA
G13-3005R2	Ped12	R98-209 x [G00-3880 x R2]	9.4082	NA	NA
G13-3022R2	Ped12	R98-209 x [G00-3880 x R2]	28.6288	NA	NA
G13-3383R2	Ped10	NCC02-307 x [G00-3213 x R2]	17.4799	NA	NA
G13-3465R2	Ped10	NCC02-307 x [G00-3213 x R2]	-22.8783	NA	NA
G13-3481R2	Ped10	NCC02-307 x [G00-3213 x R2]	6.11904	NA	NA
G13-3548R2	Ped10	NCC02-307 x [G00-3213 x R2]	-42.6462	NA	NA
G13-3554R2	Ped10	NCC02-307 x [G00-3213 x R2]	-41.3923	NA	NA
G13-3592R2	Ped10	NCC02-307 x [G00-3213 x R2]	-22.2901	NA	NA
G13-3738R2	Ped10	NCC02-307 x [G00-3213 x R2]	-64.4484	NA	NA
G13-3771R2	Ped1	5601T x [G00-3880 x R2]	-4.88549	NA	NA
G13-3905R2	Ped1	5601T x [G00-3880 x R2]	-31.736	NA	NA
G13-4008R2	Ped1	5601T x [G00-3880 x R2]	24.2491	NA	NA
G13-1269R2	Ped5	G09PR-54329R2 x {G00-3213(4) x [P97M50(3) x L85-2378]}	45.5814	NA	NA
G13-1311R2	Ped4	G09PR-54329R2 x {G00-3213(4) x [P97M50(3) x L85-2378]}	-9.6282	NA	NA
G13-1551R2	Ped8	G09PR-54457R2 x {G00-3213(4) x [P97M50(3) x L85-2378]}	-17.7913	NA	NA
G13-2942R2	Ped12	R98-209 x [G00-3880 x R2]	-16.1173	NA	NA
G13-2950R2	Ped12	R98-209 x [G00-3880 x R2]	31.6045	NA	NA
G13-3030R2	Ped12	R98-209 x [G00-3880 x R2]	20.571	NA	NA
G13-3034R2	Ped12	R98-209 x [G00-3880 x R2]	-18.5724	NA	NA
G13-3154R2	Ped12	R98-209 x [G00-3880 x R2]	17.7364	NA	NA
G13-3304R2	Ped12	R98-209 x [G00-3880 x R2]	7.82804	NA	NA
G13-3374R2	Ped10	NCC02-307 x [G00-3213 x R2]	-35.2784	NA	NA
G13-3461R2	Ped10	NCC02-307 x [G00-3213 x R2]	28.6214	NA	NA
G13-3556R2	Ped10	NCC02-307 x [G00-3213 x R2]	22.4554	NA	NA
G13-3586R2	Ped10	NCC02-307 x [G00-3213 x R2]	-16.097	NA	NA
G13-3690R2	Ped10	NCC02-307 x [G00-3213 x R2]	-21.289	NA	NA
G13-3703R2	Ped10	NCC02-307 x [G00-3213 x R2]	-27.1549	NA	NA
G13-3729R2	Ped10	NCC02-307 x [G00-3213 x R2]	-16.885	NA	NA
G13-3761R2	Ped1	5601T x [G00-3880 x R2]	-4.90377	NA	NA
G13-3855R2	Ped1	5601T x [G00-3880 x R2]	-5.06508	NA	NA
G13-3902R2	Ped1	5601T x [G00-3880 x R2]	-17.9248	NA	NA
G13-3909R2	Ped1	5601T x [G00-3880 x R2]	-55.7972	NA	NA
G13-3924R2	Ped1	5601T x [G00-3880 x R2]	-54.9018	NA	NA
G13-3984R2	Ped1	5601T x [G00-3880 x R2]	-15.4767	NA	NA
G13-4022R2	Ped1	5601T x [G00-3880 x R2]	3.00424	NA	NA
G14-1002RR	Ped20	[P97M50(5) x G01-PR68] x [P97M50(6) x L85-2378]	-15.0816	1.07156	-0.43194
G14-2492R2	Ped13	G00-3213(3)R2 x {G00-3213(2) x (G00-3209 x G01-PR68) x [G00-3213(3) x [97M50(3) x L85-2378]]}	8.73272	0.300556	0.668052
G14-2516R2	Ped21	R02-3065 x G00-3880(3)R2	3.73941	0.303505	0.487132
G14-2529R2	Ped21	R02-3065 x G00-3880(3)R2	-19.1971	0.325618	-0.211942
G14-2622R2	Ped21	R02-3065 x G00-3880(3)R2	-6.12727	0.748712	0.106477
G14-2701R2	Ped21	R02-3065 x G00-3880(3)R2	-10.1621	0.787042	-0.0729952
G14-2706R2	Ped21	R02-3065 x G00-3880(3)R2	4.8352	0.837164	0.180292
G14-2810R2	Ped21	R02-3065 x G00-3880(3)R2	-14.8827	0.703012	-0.385625
G14-2829R2	Ped21	R02-3065 x G00-3880(3)R2	-18.0192	0.959523	0.0891089
G14-2850R2	Ped22	R03-1232 x G00-3880(3)R2	17.2743	-1.65865	0.135424
G14-2851R2	Ped22	R03-1232 x G00-3880(3)R2	13.0508	-1.92106	0.479896
G14-2888R2	Ped22	R03-1232 x G00-3880(3)R2	8.38775	-0.0119737	-0.362467
G14-2890R2	Ped22	R03-1232 x G00-3880(3)R2	11.9109	0.133972	-0.750359
G14-2961R2	Ped22	R03-1232 x G00-3880(3)R2	2.74495	-0.390843	-0.156942
G14-2962R2	Ped22	R03-1232 x G00-3880(3)R2	5.53834	-2.79526	0.43358
G14-2992R2	Ped22	R03-1232 x G00-3880(3)R2	-7.50445	-1.153	0.170161
G14-3065R2	Ped22	R03-1232 x G00-3880(3)R2	-10.9048	-1.17659	0.161477
G14-3186R2	Ped17	N05-7432 x G00-3213(3)R2	3.56152	0.319721	-0.139574
G14-3364R2	Ped17	N05-7432 x G00-3213(3)R2	-3.05948	2.68876	-1.26707
G14-3489R2	Ped14	G08PR-339 x G00-3213(3)R2	10.2561	-0.348091	1.40331
G14-3624R2	Ped14	G08PR-339 x G00-3213(3)R2	4.6716	0.788516	1.47857
G14-3753R2	Ped14	G08PR-339 x G00-3213(3)R2	-45.7825	-0.62524	1.79989
G14-4118R2	Ped18	N05-7462 x G00-3880(3)R2	38.5558	-2.83654	1.04581
G14-4191R2	Ped18	N05-7462 x G00-3880(3)R2	49.9035	-2.34563	0.809893
G14-4207R2	Ped18	N05-7462 x G00-3880(3)R2	27.8264	-2.59772	1.38449
G14-4242R2	Ped18	N05-7462 x G00-3880(3)R2	9.38221	-3.05914	1.37147
G14-4243R2	Ped18	N05-7462 x G00-3880(3)R2	-3.34691	-1.65865	0.414765
G14-4296R2	Ped18	N05-7462 x G00-3880(3)R2	15.349	-0.492562	0.0283199
G14-4316R2	Ped18	N05-7462 x G00-3880(3)R2	17.052	-2.04637	0.572527
G14-4317R2	Ped18	N05-7462 x G00-3880(3)R2	-28.4203	-1.63949	0.624631
G14-4364R2	Ped18	N05-7462 x G00-3880(3)R2	9.78	-1.58789	0.0963457
G14-4396R2	Ped19	N06-7564 x G00-3213(3)R2	26.2353	1.35019	-1.03115
G14-1030RR	Ped20	[P97M50(5) x G01-PR68] x [P97M50(6) x L85-2378]	-19.9339	-0.316767	0.362538
G14-1102RR	Ped20	[P97M50(5) x G01-PR68] x [P97M50(6) x L85-2378]	-18.0971	0.846376	-0.637587
G14-1841RR	Ped16	G08PR-394 x G08-1799RR	11.7239	0.327458	0.107803
G14-1859RR	Ped16	G08PR-394 x G08-1799RR	14.919	-0.19146	0.242407
G14-2078RR	Ped16	G08PR-394 x G08-1799RR	-20.5394	-0.913817	1.46108
G14-2467R2	Ped13	G00-3213(3)R2 x {G00-3213(2) x (G00-3209 x G01-PR68) x [G00-3213(3) x [97M50(3) x L85-2378]]}	16.908	-0.751655	0.692536
G14-2473R2	Ped13	G00-3213(3)R2 x {G00-3213(2) x (G00-3209 x G01-PR68) x [G00-3213(3) x [97M50(3) x L85-2378]]}	-0.196799	-0.30055	0.42188
G14-2478R2	Ped13	G00-3213(3)R2 x {G00-3213(2) x (G00-3209 x G01-PR68) x [G00-3213(3) x [97M50(3) x L85-2378]]}	12.3526	-0.753129	0.733062
G14-2493R2	Ped13	G00-3213(3)R2 x {G00-3213(2) x (G00-3209 x G01-PR68) x [G00-3213(3) x [97M50(3) x L85-2378]]}	21.3111	-0.297602	1.00951
G14-2696R2	Ped21	R02-3065 x G00-3880(3)R2	10.372	0.96726	-0.2743
G14-2715R2	Ped21	R02-3065 x G00-3880(3)R2	-1.94105	0.688636	0.56951
G14-2718R2	Ped21	R02-3065 x G00-3880(3)R2	-23.865	-1.30448	0.188855
G14-2737R2	Ped21	R02-3065 x G00-3880(3)R2	16.2585	0.146132	-0.660744
G14-2766R2	Ped21	R02-3065 x G00-3880(3)R2	-21.9144	-0.250428	-0.193248
G14-2779R2	Ped21	R02-3065 x G00-3880(3)R2	5.57108	-0.315292	0.463853
G14-3190R2	Ped17	N05-7432 x G00-3213(3)R2	23.6574	-1.20129	0.0803031
G14-3274R2	Ped17	N05-7432 x G00-3213(3)R2	0.154256	-0.695636	-0.278642
G14-3299R2	Ped17	N05-7432 x G00-3213(3)R2	18.3614	0.187409	0.039777
G14-3513R2	Ped14	G08PR-339 x G00-3213(3)R2	4.32253	0.104854	0.216355
G14-3919R2	Ped15	G08PR-339 x G00-3880(3)R2	-18.4337	-1.29416	0.128066
G14-4098R2	Ped18	N05-7462 x G00-3880(3)R2	17.5743	-2.75067	0.872008
G14-4518R2	Ped19	N06-7564 x G00-3213(3)R2	-7.43074	0.0399893	0.497142
G14-1896RR	Ped16	G08PR-394 x G08-1799RR	-6.0475	0.354693	0.990004
G14-1937RR	Ped16	G08PR-394 x G08-1799RR	8.47579	-1.36717	1.66303
G14-2767R2	Ped21	R02-3065 x G00-3880(3)R2	-8.44712	0.136511	-0.235908
G14-2816R2	Ped21	R02-3065 x G00-3880(3)R2	-16.3514	-0.550465	-0.0839358
G14-3268R2	Ped17	N05-7432 x G00-3213(3)R2	42.3135	-0.613855	0.0231687
G14-3292R2	Ped17	N05-7432 x G00-3213(3)R2	-1.7186	-0.736214	-0.230119
G14-3310R2	Ped17	N05-7432 x G00-3213(3)R2	15.9828	-0.438426	-0.24604
G14-3585R2	Ped14	G08PR-339 x G00-3213(3)R2	36.8708	-0.212873	0.968294
G14-3713R2	Ped14	G08PR-339 x G00-3213(3)R2	33.153	1.00629	-0.188146
G14-3735R2	Ped14	G08PR-339 x G00-3213(3)R2	-22.2466	1.0741	0.0550106
G14-3750R2	Ped14	G08PR-339 x G00-3213(3)R2	13.5456	2.0397	0.118694
G14-4352R2	Ped18	N05-7462 x G00-3880(3)R2	22.7771	-1.89199	0.64698
G14-4515R2	Ped19	N06-7564 x G00-3213(3)R2	37.8441	0.928156	-0.231566

## Sheet: yield
-13.9588	-0.994452	0.0999841
0.866073	-1.47067	0.330328
26.2996	-0.287756	0.625832
1.78135	-0.31401	0.33054
44.914	-0.600118	1.02091
-3.2193	-0.147838	0.158049
-14.6935	-1.05428	-0.265908
-20.2929	-0.822054	0.60599
20.517	-0.695064	0.684539
15.4715	-0.730414	-0.0343189
-12.9776	-1.31565	0.457338
62.9303	-1.97091	0.789745
10.1165	-0.703546	0.643906
38.6231	-0.638126	0.497746
6.38714	0.926411	0.586097
18.5146	0.968919	-0.0112419
22.5181	0.0489426	0.531546
7.22684	1.26288	-0.245645
-15.847	-1.51832	0.0108743
-7.52952	0.401934	0.564222
16.2248	0.0441556	0.280227
37.6195	-0.724201	0.66256
-5.95062	-0.998057	0.165708
-19.6098	-0.862684	0.592281
-2.94662	0.475486	-0.338025
0.919163	-0.568927	0.722941
-30.2189	-0.365535	0.629211
13.188	0.268166	-0.473425
1.27743	-1.39661	0.114495
-6.99376	-1.208	0.892317
-30.0101	-2.08704	0.416542
18.2171	-1.85032	0.584908
31.1454	-1.61851	1.31176
21.0297	0.474448	-0.0758367
-2.2172	-1.22349	0.313539
-4.93157	0.385196	0.285098
-17.5552	-0.680853	0.622709
12.1916	-1.34273	0.155906
-11.9383	-0.448663	0.436477
20.2318	-0.816783	0.105598
38.643	-1.77811	0.785566
-27.8772	-0.450663	0.295303
-5.02088	-1.68069	0.383945
-13.6303	-1.39646	1.17173
9.84257	-1.72137	0.475876
19.0818	-0.876931	0.665474
-38.0181	-0.905728	0.239877
-9.45742	-0.712699	0.828849
-31.1848	0.355717	0.0436296
-15.5651	-0.783981	0.132472
-17.5708	-1.55678	0.853692
-6.80689	-1.15565	0.942981
2.16649	-0.750512	0.80848
3.80663	-1.51198	1.44407
-27.3684	-0.278139	0.0942012
-12.2578	0.999343	-0.0395998
-28.8072	-0.366095	0.444628
-7.77565	0.694305	0.300073
63.1002	-0.257212	1.16081
4.42672	0.865069	0.356014
3.75406	-0.458181	0.0614826
0.884135	-2.57037	0.806677
9.57008	-0.63632	0.0769545
8.99296	-1.15633	0.361024
15.9666	-1.5117	0.249063
11.3851	-1.00271	0.544542
42.3538	-1.10791	0.683063
13.3033	-1.47063	0.230978
9.51745	-2.57128	0.400011
11.004	-1.20784	0.351022
-1.69111	-0.872324	0.747441
-7.3514	-0.627434	0.771729
-14.4428	-1.76859	0.186026
11.3513	-1.37572	1.0163
-10.0609	-0.808568	-0.240551
23.0514	0.0437904	0.611704
-52.3263	0.240856	-0.489593
-5.75969	-0.895984	1.19075
-18.3348	-1.51074	0.462764
20.0998	0.716256	-0.159905
34.7317	-1.3684	1.3863
58.1451	0.42928	0.61088
-1.60644	-1.0335	0.754989
8.16091	-0.691712	0.666249
41.3612	0.19426	-0.48571
12.8224	-0.534744	-0.301469
-37.7926	0.0203044	-0.050055
-44.392	-0.0253958	-0.209264
-6.41469	0.194984	-0.0496282
-3.3196	0.0475639	-0.231995
-21.3323	0.825941	-0.877517
11.899	-1.14726	-0.323606
77.7075	0.969688	0.0888914
-25.1901	-1.19738	0.250996
5.22716	0.126447	-0.139791
-34.3259	0.28566	0.000602588
38.4245	-2.86412	0.0899125
-32.1008	-0.351194	-0.0775548
5.04037	-1.54972	-0.0688706
-7.36579	0.0895917	-0.527683
5.14759	0.289332	-1.1858
13.2123	-2.95095	0.267343
24.8143	-0.241379	-0.808044
-11.5127	0.103373	-1.15275
-35.7138	0.921039	-0.987943
26.4923	0.0269251	-0.326074
10.9974	-0.260543	-0.783439
-0.0795578	0.914392	-0.133575
26.054	1.79671	-0.795444
-56.0802	-2.51813	-0.0455669
-12.0023	0.0447875	0.0432531
-37.4931	1.8229	-0.753335
-14.5991	0.457391	-0.300021
78.6459	-1.08888	-0.12161
34.1924	2.06354	-0.191896
41.7612	0.680861	-0.585475
19.8406	0.383681	-0.725545
11.0088	-2.90084	0.320879
18.7461	-1.79267	0.441922
42.3596	0.110221	-0.559996
-2.33109	1.25198	-0.211732
-73.4952	0.0999111	0.268364
9.2036	-0.445202	-0.150086
-7.87969	0.0357703	0.0516868
-0.916927	-0.546538	0.222475
-11.1738	-0.461034	-0.0887069
28.9248	1.10604	-0.961464
30.9197	1.16501	-1.12357
-9.36344	-0.930553	0.463757
-26.2308	0.556107	-0.457946
-8.05662	1.37022	-0.942793
-2.53482	1.38246	-1.04439
-11.5783	-1.50696	-0.0529497
-65.1177	1.66329	-0.463573
13.6632	-1.60243	0.585188
-39.2432	0.192786	-0.290316
-13.6178	-1.06323	-0.433605
-6.42468	-2.03915	0.735861
-7.7101	-0.289277	-0.377158
34.4179	-1.62932	0.527441
39.9371	-1.31974	0.695335
-30.1092	-0.320986	-0.430283
-6.93545	0.357896	-0.306237
-46.0126	-1.08829	0.871912
6.16325	0.0239767	-0.16397
7.36328	-1.17307	1.00115
16.3108	-0.811336	-0.0487223
-2.96765	-0.188308	-0.346337
-20.4508	-0.519252	0.175733
2.44769	0.371887	0.297738
38.876	0.0401929	-0.224759
43.8509	-0.767804	-0.36216
-124.806	0.848053	-0.000418051
44.3477	1.37326	-0.591335
-52.1024	-0.00917958	0.294416
2.67417	0.122024	0.222048
40.2044	0.241434	-0.620314
-3.7629	-1.3905	0.143891
-1.02012	0.46109	-0.362684
-50.42	0.88196	-0.3116
25.4584	-0.408281	0.325375
-47.6915	-1.18854	-0.0413708
43.4817	-0.412386	-0.304363
-30.4358	-0.312864	-0.79255
-1.18554	0.413915	0.203233
21.9002	-3.0571	0.278922
-20.0249	-1.18339	-0.260943
30.3263	1.57706	-0.290316
0.252811	2.21618	-1.24527
-16.4413	0.239279	-0.226333
44.9151	1.37632	-0.163641
-63.5115	2.11298	-1.95448
27.6255	0.639564	0.314335
-40.262	0.729706	-0.570287
38.4443	-0.258779	0.361808
3.7288	0.295298	0.685503
-45.2616	1.39358	-0.363832
5.31719	0.715666	-0.522528
-12.124	0.271711	-0.113439
-6.12705	1.88012	-0.960713
56.5628	-0.257526	-0.644619
37.5559	0.713971	-0.301595
-0.0473552	0.230655	-0.102794
4.51112	0.683013	-0.321858
3.48775	1.92281	-0.168438
44.5548	-0.18529	-0.0135709
-9.7547	0.259137	-0.380339
-33.336	0.307092	0.371426
-24.5551	0.206847	0.0153763
-28.615	0.565077	0.0920863
-8.73512	-0.280892	0.276414
51.8915	1.27096	-0.46978
29.3123	0.211269	0.576951
-4.83233	0.926255	-0.40291
12.1815	1.3523	-0.0396233
19.2924	1.05676	-0.445407
36.819	0.821587	0.21077
10.0931	0.535593	-0.413042
6.48717	1.21689	-0.153452
-17.605	0.347116	0.156283
-16.6989	-0.179172	-0.082531
-62.0247	-0.266371	-0.138044
-10.3556	1.39969	-1.02621
5.45957	0.0935544	-0.0955572
-21.8904	0.164316	-0.421213
-1.62886	0.13778	-0.314108
14.9754	0.603627	-0.522528
-1.88078	0.492319	0.0606889
8.98946	1.24026	-0.15107
-4.69906	0.901415	0.277861
16.8692	1.76802	-0.329095
-37.3505	-1.87325	0.184717
-4.79976	1.30955	-0.310279
-25.3465	0.165152	0.421889
26.2631	1.04441	-0.134636
8.85162	-0.118951	-0.198833
-46.4699	0.171466	-0.158307
49.2007	1.51888	-0.75896
-19.0873	-0.0260767	-0.0844914
-41.539	-0.420941	0.11431
10.4519	-0.450425	0.452992
-43.2326	0.217387	0.549965
-18.811	0.327975	0.208316
8.45755	-0.395879	0.19102
8.41297	0.514954	-0.620014
51.1366	0.744929	-0.132254
-17.0923	0.133137	0.00235006
-5.46909	-0.440105	-0.130294
35.3005	1.49284	-0.564292
-35.8746	1.25965	0.0810205
-25.27	0.986918	0.363255
-21.8862	0.817204	0.325969
39.5353	0.0655446	0.292335
23.6458	1.04441	0.0954941
-5.79192	1.25194	-0.60317
-18.8451	1.68252	-0.117781
21.4757	2.24736	-1.00305
-22.2537	0.889621	-0.17082
5.84785	0.339745	-0.322792
17.9106	0.828958	-0.168438
-22.1758	1.17392	-0.110544
8.543	0.765568	-0.352253
-16.4809	0.373626	-0.155881
37.0549	1.41149	-0.273582
10.0579	1.32304	-0.694764
7.66399	1.1137	-0.829368
-7.16354	1.59871	-0.765684
-12.5848	1.07589	0.00673372
19.9251	1.1695	-0.45212
-41.179	0.823061	-0.738697
26.4209	0.852401	-0.409093
-2.19543	-0.282059	-0.241598
16.8087	0.0624559	0.1012
-34.543	1.23847	-0.188986
-33.634	0.541443	-0.0575793
-22.9762	0.520666	-0.210946
-1.13854	1.85904	-0.0075716
-8.4801	0.720137	0.0584115
-32.433	0.908356	-0.346101
-32.2394	1.12821	-0.465201
-13.3339	1.18935	-0.72894
28.4903	0.422524	-0.477037
10.9789	-0.697351	0.278327
13.4004	-0.744106	0.087067
26.3199	0.571102	-0.049277
-65.7676	-0.286319	-0.385967
45.2384	1.96434	-0.921824
1.41019	-0.0494494	0.0596641
18.4123	-0.656226	0.0428378
-24.2483	1.08815	-1.45694
10.0164	0.655938	-0.937082
-29.8229	-0.373523	-0.0196081
32.6072	-0.141779	0.0161386
-10.2914	-0.395948	0.078385
50.5675	0.65077	0.0354329
54.8548	-0.360377	-0.184166
31.7848	-0.0634071	-0.393876
25.8799	-0.268092	0.0529823
-31.2776	0.239296	-0.89716
-6.65039	0.296411	0.131501
37.9831	-0.79351	0.522861
-34.3934	1.11647	-0.300039
-35.8051	1.36408	-0.945304
23.994	-0.117482	0.19216
27.155	0.164341	-0.0978663
-18.3593	0.909748	-0.0909324
-48.6981	1.88567	-0.694257
-22.2149	0.321821	-0.357334
-5.31655	0.450228	0.0262112
-22.7204	2.0984	-0.552667
20.7452	-0.643035	0.109536
-21.6802	0.743347	-0.946886
-15.1473	1.40145	-0.790649
48.477	-0.00418947	0.0931585
-13.8604	-0.114027	0.0202661
21.6948	-1.34679	0.549447
1.29396	0.00815302	0.194002
-17.0082	0.201182	-0.299529
11.4245	1.15162	-0.856879
-28.3569	1.10349	-0.477578
-29.3677	0.831183	-0.149262
-2.24086	2.48418	-1.5445
-20.8957	0.346108	-0.0576571
-37.7815	0.0405824	-0.320028
7.56974	0.705555	-0.8076
-0.404633	0.722498	-0.424647
17.7615	1.70869	-0.280547
5.26162	-1.11769	0.0125955
-26.4477	-0.179766	0.0370923
-31.1112	-0.449734	0.60772
-22.6725	1.84356	-0.778563
36.2866	1.07763	-0.53312
-29.5096	0.856324	-0.0724053
90.6707	-0.36514	-0.317413
69.3036	1.19865	-0.522674
34.4038	-0.252076	0.190318
11.9573	0.443731	0.404318
-27.5243	-0.00971795	-0.0967219
12.3818	0.788369	0.186201
-70.3671	1.22851	-0.756041
15.1416	2.35066	-0.42703
-12.126	1.81043	-0.122651
-76.1679	0.842912	-0.123959
19.944	-0.160831	-0.114175
-38.8329	0.489197	-0.11792
30.0921	0.840441	-0.63616
12.4784	0.374656	-0.0188325
32.5086	-0.0117136	-0.664797
-11.8502	-0.31344	-0.403558
-8.7348	-0.615905	-0.594857
-39.8614	0.817175	-0.983547
-3.84966	1.56117	-0.947731
-10.4431	2.18476	-1.02768
33.7111	1.69688	-0.86529
43.7652	NA	NA
-15.4473	NA	NA
-3.74471	NA	NA
-9.55657	NA	NA
5.67731	NA	NA
-13.0756	NA	NA
4.60878	NA	NA
41.9583	NA	NA
8.74154	NA	NA
35.2382	NA	NA
39.5716	NA	NA
33.3974	NA	NA
37.0882	NA	NA
64.507	NA	NA
41.9566	NA	NA
-14.0272	NA	NA
43.3898	NA	NA
-2.59126	NA	NA
19.8698	NA	NA
-1.79808	NA	NA
-11.5746	NA	NA
24.1456	NA	NA
-17.1591	NA	NA
-18.6617	NA	NA
-74.8224	NA	NA
-84.5633	NA	NA
-110.297	NA	NA
-30.4174	NA	NA
-70.0442	NA	NA
-14.2216	NA	NA
0.351859	NA	NA
29.8197	NA	NA
33.175	NA	NA
-32.641	NA	NA
-14.0192	NA	NA
56.8373	NA	NA
25.8419	NA	NA
-39.6197	NA	NA
-7.9958	NA	NA
14.4791	NA	NA
22.9595	NA	NA
-40.5899	NA	NA
-34.2254	NA	NA
13.862	NA	NA
56.4629	NA	NA
-19.1338	NA	NA
21.5406	NA	NA
9.4082	NA	NA
28.6288	NA	NA
17.4799	NA	NA
-22.8783	NA	NA
6.11904	NA	NA
-42.6462	NA	NA
-41.3923	NA	NA
-22.2901	NA	NA
-64.4484	NA	NA
-4.88549	NA	NA
-31.736	NA	NA
24.2491	NA	NA
45.5814	NA	NA
-9.6282	NA	NA
-17.7913	NA	NA
-16.1173	NA	NA
31.6045	NA	NA
20.571	NA	NA
-18.5724	NA	NA
17.7364	NA	NA
7.82804	NA	NA
-35.2784	NA	NA
28.6214	NA	NA
22.4554	NA	NA
-16.097	NA	NA
-21.289	NA	NA
-27.1549	NA	NA
-16.885	NA	NA
-4.90377	NA	NA
-5.06508	NA	NA
-17.9248	NA	NA
-55.7972	NA	NA
-54.9018	NA	NA
-15.4767	NA	NA
3.00424	NA	NA
-15.0816	1.07156	-0.43194
8.73272	0.300556	0.668052
3.73941	0.303505	0.487132
-19.1971	0.325618	-0.211942
-6.12727	0.748712	0.106477
-10.1621	0.787042	-0.0729952
4.8352	0.837164	0.180292
-14.8827	0.703012	-0.385625
-18.0192	0.959523	0.0891089
17.2743	-1.65865	0.135424
13.0508	-1.92106	0.479896
8.38775	-0.0119737	-0.362467
11.9109	0.133972	-0.750359
2.74495	-0.390843	-0.156942
5.53834	-2.79526	0.43358
-7.50445	-1.153	0.170161
-10.9048	-1.17659	0.161477
3.56152	0.319721	-0.139574
-3.05948	2.68876	-1.26707
10.2561	-0.348091	1.40331
4.6716	0.788516	1.47857
-45.7825	-0.62524	1.79989
38.5558	-2.83654	1.04581
49.9035	-2.34563	0.809893
27.8264	-2.59772	1.38449
9.38221	-3.05914	1.37147
-3.34691	-1.65865	0.414765
15.349	-0.492562	0.0283199
17.052	-2.04637	0.572527
-28.4203	-1.63949	0.624631
9.78	-1.58789	0.0963457
26.2353	1.35019	-1.03115
-19.9339	-0.316767	0.362538
-18.0971	0.846376	-0.637587
11.7239	0.327458	0.107803
14.919	-0.19146	0.242407
-20.5394	-0.913817	1.46108
16.908	-0.751655	0.692536
-0.196799	-0.30055	0.42188
12.3526	-0.753129	0.733062
21.3111	-0.297602	1.00951
10.372	0.96726	-0.2743
-1.94105	0.688636	0.56951
-23.865	-1.30448	0.188855
16.2585	0.146132	-0.660744
-21.9144	-0.250428	-0.193248
5.57108	-0.315292	0.463853
23.6574	-1.20129	0.0803031
0.154256	-0.695636	-0.278642
18.3614	0.187409	0.039777
4.32253	0.104854	0.216355
-18.4337	-1.29416	0.128066
17.5743	-2.75067	0.872008
-7.43074	0.0399893	0.497142
-6.0475	0.354693	0.990004
8.47579	-1.36717	1.66303
-8.44712	0.136511	-0.235908
-16.3514	-0.550465	-0.0839358
42.3135	-0.613855	0.0231687
-1.7186	-0.736214	-0.230119
15.9828	-0.438426	-0.24604
36.8708	-0.212873	0.968294
33.153	1.00629	-0.188146
-22.2466	1.0741	0.0550106
13.5456	2.0397	0.118694
22.7771	-1.89199	0.64698
37.8441	0.928156	-0.231566

## Sheet: protein + oil
-13.9588	-0.994452	0.0999841
0.866073	-1.47067	0.330328
26.2996	-0.287756	0.625832
1.78135	-0.31401	0.33054
44.914	-0.600118	1.02091
-3.2193	-0.147838	0.158049
-14.6935	-1.05428	-0.265908
-20.2929	-0.822054	0.60599
20.517	-0.695064	0.684539
15.4715	-0.730414	-0.0343189
-12.9776	-1.31565	0.457338
62.9303	-1.97091	0.789745
10.1165	-0.703546	0.643906
38.6231	-0.638126	0.497746
6.38714	0.926411	0.586097
18.5146	0.968919	-0.0112419
22.5181	0.0489426	0.531546
7.22684	1.26288	-0.245645
-15.847	-1.51832	0.0108743
-7.52952	0.401934	0.564222
16.2248	0.0441556	0.280227
37.6195	-0.724201	0.66256
-5.95062	-0.998057	0.165708
-19.6098	-0.862684	0.592281
-2.94662	0.475486	-0.338025
0.919163	-0.568927	0.722941
-30.2189	-0.365535	0.629211
13.188	0.268166	-0.473425
1.27743	-1.39661	0.114495
-6.99376	-1.208	0.892317
-30.0101	-2.08704	0.416542
18.2171	-1.85032	0.584908
31.1454	-1.61851	1.31176
21.0297	0.474448	-0.0758367
-2.2172	-1.22349	0.313539
-4.93157	0.385196	0.285098
-17.5552	-0.680853	0.622709
12.1916	-1.34273	0.155906
-11.9383	-0.448663	0.436477
20.2318	-0.816783	0.105598
38.643	-1.77811	0.785566
-27.8772	-0.450663	0.295303
-5.02088	-1.68069	0.383945
-13.6303	-1.39646	1.17173
9.84257	-1.72137	0.475876
19.0818	-0.876931	0.665474
-38.0181	-0.905728	0.239877
-9.45742	-0.712699	0.828849
-31.1848	0.355717	0.0436296
-15.5651	-0.783981	0.132472
-17.5708	-1.55678	0.853692
-6.80689	-1.15565	0.942981
2.16649	-0.750512	0.80848
3.80663	-1.51198	1.44407
-27.3684	-0.278139	0.0942012
-12.2578	0.999343	-0.0395998
-28.8072	-0.366095	0.444628
-7.77565	0.694305	0.300073
63.1002	-0.257212	1.16081
4.42672	0.865069	0.356014
3.75406	-0.458181	0.0614826
0.884135	-2.57037	0.806677
9.57008	-0.63632	0.0769545
8.99296	-1.15633	0.361024
15.9666	-1.5117	0.249063
11.3851	-1.00271	0.544542
42.3538	-1.10791	0.683063
13.3033	-1.47063	0.230978
9.51745	-2.57128	0.400011
11.004	-1.20784	0.351022
-1.69111	-0.872324	0.747441
-7.3514	-0.627434	0.771729
-14.4428	-1.76859	0.186026
11.3513	-1.37572	1.0163
-10.0609	-0.808568	-0.240551
23.0514	0.0437904	0.611704
-52.3263	0.240856	-0.489593
-5.75969	-0.895984	1.19075
-18.3348	-1.51074	0.462764
20.0998	0.716256	-0.159905
34.7317	-1.3684	1.3863
58.1451	0.42928	0.61088
-1.60644	-1.0335	0.754989
8.16091	-0.691712	0.666249
41.3612	0.19426	-0.48571
12.8224	-0.534744	-0.301469
-37.7926	0.0203044	-0.050055
-44.392	-0.0253958	-0.209264
-6.41469	0.194984	-0.0496282
-3.3196	0.0475639	-0.231995
-21.3323	0.825941	-0.877517
11.899	-1.14726	-0.323606
77.7075	0.969688	0.0888914
-25.1901	-1.19738	0.250996
5.22716	0.126447	-0.139791
-34.3259	0.28566	0.000602588
38.4245	-2.86412	0.0899125
-32.1008	-0.351194	-0.0775548
5.04037	-1.54972	-0.0688706
-7.36579	0.0895917	-0.527683
5.14759	0.289332	-1.1858
13.2123	-2.95095	0.267343
24.8143	-0.241379	-0.808044
-11.5127	0.103373	-1.15275
-35.7138	0.921039	-0.987943
26.4923	0.0269251	-0.326074
10.9974	-0.260543	-0.783439
-0.0795578	0.914392	-0.133575
26.054	1.79671	-0.795444
-56.0802	-2.51813	-0.0455669
-12.0023	0.0447875	0.0432531
-37.4931	1.8229	-0.753335
-14.5991	0.457391	-0.300021
78.6459	-1.08888	-0.12161
34.1924	2.06354	-0.191896
41.7612	0.680861	-0.585475
19.8406	0.383681	-0.725545
11.0088	-2.90084	0.320879
18.7461	-1.79267	0.441922
42.3596	0.110221	-0.559996
-2.33109	1.25198	-0.211732
-73.4952	0.0999111	0.268364
9.2036	-0.445202	-0.150086
-7.87969	0.0357703	0.0516868
-0.916927	-0.546538	0.222475
-11.1738	-0.461034	-0.0887069
28.9248	1.10604	-0.961464
30.9197	1.16501	-1.12357
-9.36344	-0.930553	0.463757
-26.2308	0.556107	-0.457946
-8.05662	1.37022	-0.942793
-2.53482	1.38246	-1.04439
-11.5783	-1.50696	-0.0529497
-65.1177	1.66329	-0.463573
13.6632	-1.60243	0.585188
-39.2432	0.192786	-0.290316
-13.6178	-1.06323	-0.433605
-6.42468	-2.03915	0.735861
-7.7101	-0.289277	-0.377158
34.4179	-1.62932	0.527441
39.9371	-1.31974	0.695335
-30.1092	-0.320986	-0.430283
-6.93545	0.357896	-0.306237
-46.0126	-1.08829	0.871912
6.16325	0.0239767	-0.16397
7.36328	-1.17307	1.00115
16.3108	-0.811336	-0.0487223
-2.96765	-0.188308	-0.346337
-20.4508	-0.519252	0.175733
2.44769	0.371887	0.297738
38.876	0.0401929	-0.224759
43.8509	-0.767804	-0.36216
-124.806	0.848053	-0.000418051
44.3477	1.37326	-0.591335
-52.1024	-0.00917958	0.294416
2.67417	0.122024	0.222048
40.2044	0.241434	-0.620314
-3.7629	-1.3905	0.143891
-1.02012	0.46109	-0.362684
-50.42	0.88196	-0.3116
25.4584	-0.408281	0.325375
-47.6915	-1.18854	-0.0413708
43.4817	-0.412386	-0.304363
-30.4358	-0.312864	-0.79255
-1.18554	0.413915	0.203233
21.9002	-3.0571	0.278922
-20.0249	-1.18339	-0.260943
30.3263	1.57706	-0.290316
0.252811	2.21618	-1.24527
-16.4413	0.239279	-0.226333
44.9151	1.37632	-0.163641
-63.5115	2.11298	-1.95448
27.6255	0.639564	0.314335
-40.262	0.729706	-0.570287
38.4443	-0.258779	0.361808
3.7288	0.295298	0.685503
-45.2616	1.39358	-0.363832
5.31719	0.715666	-0.522528
-12.124	0.271711	-0.113439
-6.12705	1.88012	-0.960713
56.5628	-0.257526	-0.644619
37.5559	0.713971	-0.301595
-0.0473552	0.230655	-0.102794
4.51112	0.683013	-0.321858
3.48775	1.92281	-0.168438
44.5548	-0.18529	-0.0135709
-9.7547	0.259137	-0.380339
-33.336	0.307092	0.371426
-24.5551	0.206847	0.0153763
-28.615	0.565077	0.0920863
-8.73512	-0.280892	0.276414
51.8915	1.27096	-0.46978
29.3123	0.211269	0.576951
-4.83233	0.926255	-0.40291
12.1815	1.3523	-0.0396233
19.2924	1.05676	-0.445407
36.819	0.821587	0.21077
10.0931	0.535593	-0.413042
6.48717	1.21689	-0.153452
-17.605	0.347116	0.156283
-16.6989	-0.179172	-0.082531
-62.0247	-0.266371	-0.138044
-10.3556	1.39969	-1.02621
5.45957	0.0935544	-0.0955572
-21.8904	0.164316	-0.421213
-1.62886	0.13778	-0.314108
14.9754	0.603627	-0.522528
-1.88078	0.492319	0.0606889
8.98946	1.24026	-0.15107
-4.69906	0.901415	0.277861
16.8692	1.76802	-0.329095
-37.3505	-1.87325	0.184717
-4.79976	1.30955	-0.310279
-25.3465	0.165152	0.421889
26.2631	1.04441	-0.134636
8.85162	-0.118951	-0.198833
-46.4699	0.171466	-0.158307
49.2007	1.51888	-0.75896
-19.0873	-0.0260767	-0.0844914
-41.539	-0.420941	0.11431
10.4519	-0.450425	0.452992
-43.2326	0.217387	0.549965
-18.811	0.327975	0.208316
8.45755	-0.395879	0.19102
8.41297	0.514954	-0.620014
51.1366	0.744929	-0.132254
-17.0923	0.133137	0.00235006
-5.46909	-0.440105	-0.130294
35.3005	1.49284	-0.564292
-35.8746	1.25965	0.0810205
-25.27	0.986918	0.363255
-21.8862	0.817204	0.325969
39.5353	0.0655446	0.292335
23.6458	1.04441	0.0954941
-5.79192	1.25194	-0.60317
-18.8451	1.68252	-0.117781
21.4757	2.24736	-1.00305
-22.2537	0.889621	-0.17082
5.84785	0.339745	-0.322792
17.9106	0.828958	-0.168438
-22.1758	1.17392	-0.110544
8.543	0.765568	-0.352253
-16.4809	0.373626	-0.155881
37.0549	1.41149	-0.273582
10.0579	1.32304	-0.694764
7.66399	1.1137	-0.829368
-7.16354	1.59871	-0.765684
-12.5848	1.07589	0.00673372
19.9251	1.1695	-0.45212
-41.179	0.823061	-0.738697
26.4209	0.852401	-0.409093
-2.19543	-0.282059	-0.241598
16.8087	0.0624559	0.1012
-34.543	1.23847	-0.188986
-33.634	0.541443	-0.0575793
-22.9762	0.520666	-0.210946
-1.13854	1.85904	-0.0075716
-8.4801	0.720137	0.0584115
-32.433	0.908356	-0.346101
-32.2394	1.12821	-0.465201
-13.3339	1.18935	-0.72894
28.4903	0.422524	-0.477037
10.9789	-0.697351	0.278327
13.4004	-0.744106	0.087067
26.3199	0.571102	-0.049277
-65.7676	-0.286319	-0.385967
45.2384	1.96434	-0.921824
1.41019	-0.0494494	0.0596641
18.4123	-0.656226	0.0428378
-24.2483	1.08815	-1.45694
10.0164	0.655938	-0.937082
-29.8229	-0.373523	-0.0196081
32.6072	-0.141779	0.0161386
-10.2914	-0.395948	0.078385
50.5675	0.65077	0.0354329
54.8548	-0.360377	-0.184166
31.7848	-0.0634071	-0.393876
25.8799	-0.268092	0.0529823
-31.2776	0.239296	-0.89716
-6.65039	0.296411	0.131501
37.9831	-0.79351	0.522861
-34.3934	1.11647	-0.300039
-35.8051	1.36408	-0.945304
23.994	-0.117482	0.19216
27.155	0.164341	-0.0978663
-18.3593	0.909748	-0.0909324
-48.6981	1.88567	-0.694257
-22.2149	0.321821	-0.357334
-5.31655	0.450228	0.0262112
-22.7204	2.0984	-0.552667
20.7452	-0.643035	0.109536
-21.6802	0.743347	-0.946886
-15.1473	1.40145	-0.790649
48.477	-0.00418947	0.0931585
-13.8604	-0.114027	0.0202661
21.6948	-1.34679	0.549447
1.29396	0.00815302	0.194002
-17.0082	0.201182	-0.299529
11.4245	1.15162	-0.856879
-28.3569	1.10349	-0.477578
-29.3677	0.831183	-0.149262
-2.24086	2.48418	-1.5445
-20.8957	0.346108	-0.0576571
-37.7815	0.0405824	-0.320028
7.56974	0.705555	-0.8076
-0.404633	0.722498	-0.424647
17.7615	1.70869	-0.280547
5.26162	-1.11769	0.0125955
-26.4477	-0.179766	0.0370923
-31.1112	-0.449734	0.60772
-22.6725	1.84356	-0.778563
36.2866	1.07763	-0.53312
-29.5096	0.856324	-0.0724053
90.6707	-0.36514	-0.317413
69.3036	1.19865	-0.522674
34.4038	-0.252076	0.190318
11.9573	0.443731	0.404318
-27.5243	-0.00971795	-0.0967219
12.3818	0.788369	0.186201
-70.3671	1.22851	-0.756041
15.1416	2.35066	-0.42703
-12.126	1.81043	-0.122651
-76.1679	0.842912	-0.123959
19.944	-0.160831	-0.114175
-38.8329	0.489197	-0.11792
30.0921	0.840441	-0.63616
12.4784	0.374656	-0.0188325
32.5086	-0.0117136	-0.664797
-11.8502	-0.31344	-0.403558
-8.7348	-0.615905	-0.594857
-39.8614	0.817175	-0.983547
-3.84966	1.56117	-0.947731
-10.4431	2.18476	-1.02768
33.7111	1.69688	-0.86529
-15.0816	1.07156	-0.43194
8.73272	0.300556	0.668052
3.73941	0.303505	0.487132
-19.1971	0.325618	-0.211942
-6.12727	0.748712	0.106477
-10.1621	0.787042	-0.0729952
4.8352	0.837164	0.180292
-14.8827	0.703012	-0.385625
-18.0192	0.959523	0.0891089
17.2743	-1.65865	0.135424
13.0508	-1.92106	0.479896
8.38775	-0.0119737	-0.362467
11.9109	0.133972	-0.750359
2.74495	-0.390843	-0.156942
5.53834	-2.79526	0.43358
-7.50445	-1.153	0.170161
-10.9048	-1.17659	0.161477
3.56152	0.319721	-0.139574
-3.05948	2.68876	-1.26707
10.2561	-0.348091	1.40331
4.6716	0.788516	1.47857
-45.7825	-0.62524	1.79989
38.5558	-2.83654	1.04581
49.9035	-2.34563	0.809893
27.8264	-2.59772	1.38449
9.38221	-3.05914	1.37147
-3.34691	-1.65865	0.414765
15.349	-0.492562	0.0283199
17.052	-2.04637	0.572527
-28.4203	-1.63949	0.624631
9.78	-1.58789	0.0963457
26.2353	1.35019	-1.03115
-19.9339	-0.316767	0.362538
-18.0971	0.846376	-0.637587
11.7239	0.327458	0.107803
14.919	-0.19146	0.242407
-20.5394	-0.913817	1.46108
16.908	-0.751655	0.692536
-0.196799	-0.30055	0.42188
12.3526	-0.753129	0.733062
21.3111	-0.297602	1.00951
10.372	0.96726	-0.2743
-1.94105	0.688636	0.56951
-23.865	-1.30448	0.188855
16.2585	0.146132	-0.660744
-21.9144	-0.250428	-0.193248
5.57108	-0.315292	0.463853
23.6574	-1.20129	0.0803031
0.154256	-0.695636	-0.278642
18.3614	0.187409	0.039777
4.32253	0.104854	0.216355
-18.4337	-1.29416	0.128066
17.5743	-2.75067	0.872008
-7.43074	0.0399893	0.497142
-6.0475	0.354693	0.990004
8.47579	-1.36717	1.66303
-8.44712	0.136511	-0.235908
-16.3514	-0.550465	-0.0839358
42.3135	-0.613855	0.0231687
-1.7186	-0.736214	-0.230119
15.9828	-0.438426	-0.24604
36.8708	-0.212873	0.968294
33.153	1.00629	-0.188146
-22.2466	1.0741	0.0550106
13.5456	2.0397	0.118694
22.7771	-1.89199	0.64698
37.8441	0.928156	-0.231566
